# Supplementary material for: Sustained elevation of NF-κB activity sensitizes offspring of maternal inflammation to hypertension via impairing PGC-1α recovery
Source: PubMed Central journal article supplement (PMC5018852; doi:10.1038/srep32642), 2016-09-12
Supplement: srep32642-s1.pdf [file srep32642-s1.pdf]

**Sustained elevation of NF- $\kappa$ B activity sensitizes offspring of maternal**

**inflammation to hypertension *via* impairing PGC-1 $\alpha$  recovery**

Yafei Deng<sup>1,2,8</sup>, Qi Zhang<sup>1,2,8</sup>, Hongqin Luo<sup>1,2,8</sup>, Xianhua Chen<sup>3,8</sup>, Qi Han<sup>1,2</sup>, Fangjie Wang<sup>1,2</sup>,  
Pei Huang<sup>1,2</sup>, Wenjing Lai<sup>1,2</sup>, Xiao Guan<sup>1,2</sup>, Xiaodong Pan<sup>1,2</sup>, Yan Ji<sup>1,2</sup>, Wei Guo<sup>1,2</sup>, Ling  
Che<sup>1,2</sup>, Yuan Tang<sup>1,2</sup>, Liangqi Gu<sup>4</sup>, Jianhua Yu<sup>5</sup>, Michael Namaka<sup>6,7</sup>, Youcai Deng<sup>1,2,\*</sup>, Xiaohui  
Li<sup>1,2,\*</sup>

**Supplementary Materials**

Supplementary Figures and Figure Legend

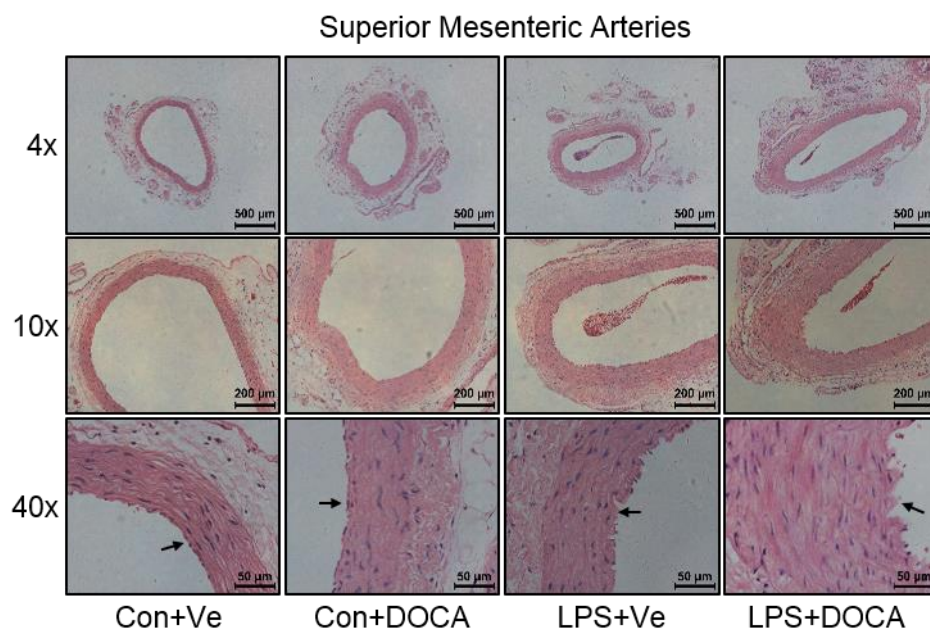

**Supplemental Fig. S1. Effects of DOCA-salt treatment on superior mesenteric arteries in adult offspring of LPS-treated mothers.** Offspring were treated as described in Fig. 1a and HE staining of superior mesenteric arteries were shown. The arrow direction represents endothelium and representative pictures from each group were shown. n=6 for each group.

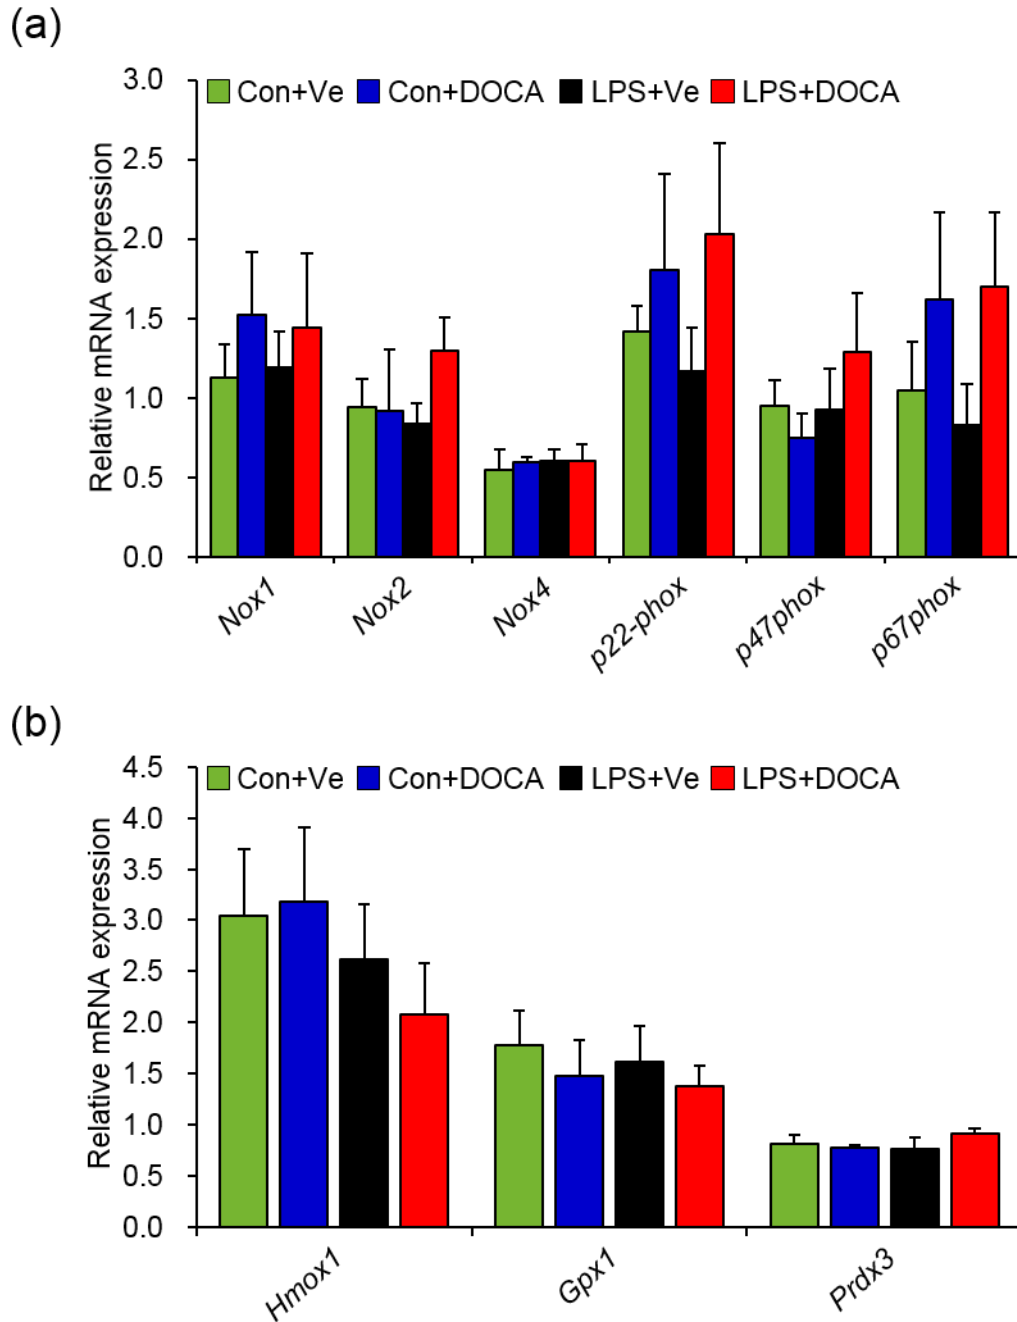

**Supplemental Fig. S2. The mRNA expression of NADPH oxidase subunits and antioxidant-related genes in adult offspring of LPS-treated mothers after 4 weeks of DOCA-salt treatment.** (a) and (b) Offspring were treated as described in Fig.1a and the mRNA levels of various subunits of NADPH oxidase (a) and antioxidant-related genes (b) in thoracic aortas were determined by real-time RT-PCR.  $\beta$ -actin was taken as internal control. Error bar represents S.E.M. n=6-7 for each group in (a) and (b).

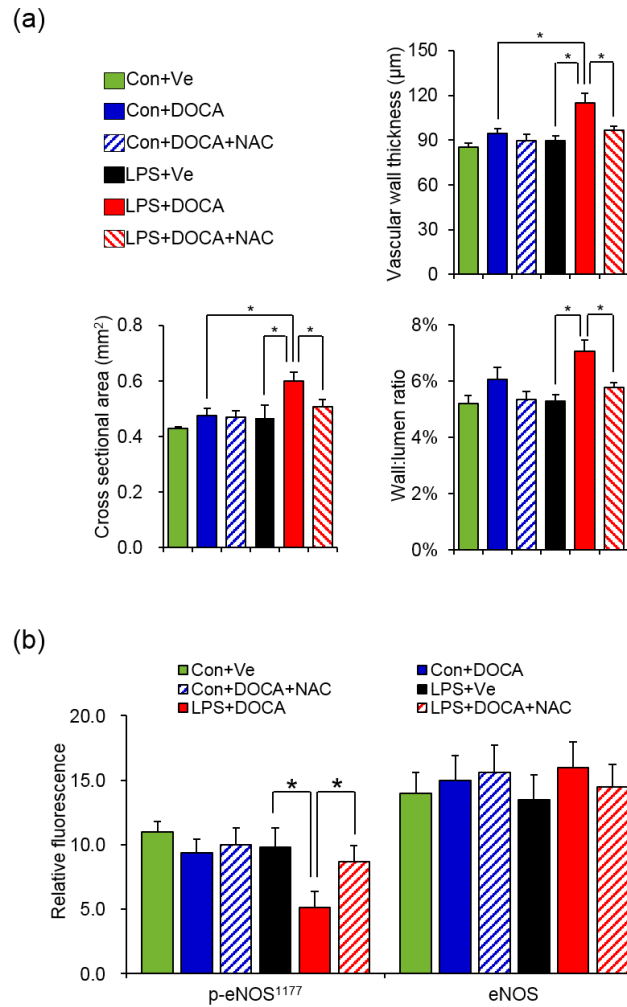

**Supplemental Fig. S3 Antioxidant NAC prevents vascular damage in thoracic aortas of offspring that received prenatal exposure to LPS after 4 weeks of DOCA-salt treatment.**

(a) HE staining of thoracic aortas and representative pictures from each group were shown in Fig. 3b and the values of vascular wall thickness, cross sectional area and wall:lumen ratio were quantified using NIS-Elements BR software. (b) Immunofluorescence staining of the p-eNOS<sup>Ser1177</sup> and eNOS protein levels and representative pictures from each group were shown in Fig.3c and the value of fluorescence was quantified using Image J software. Error bar represents S.E.M. \* $P < 0.05$  denotes the statistical comparison between the two marked treatment groups. n=6 per group. Two-way ANOVA.

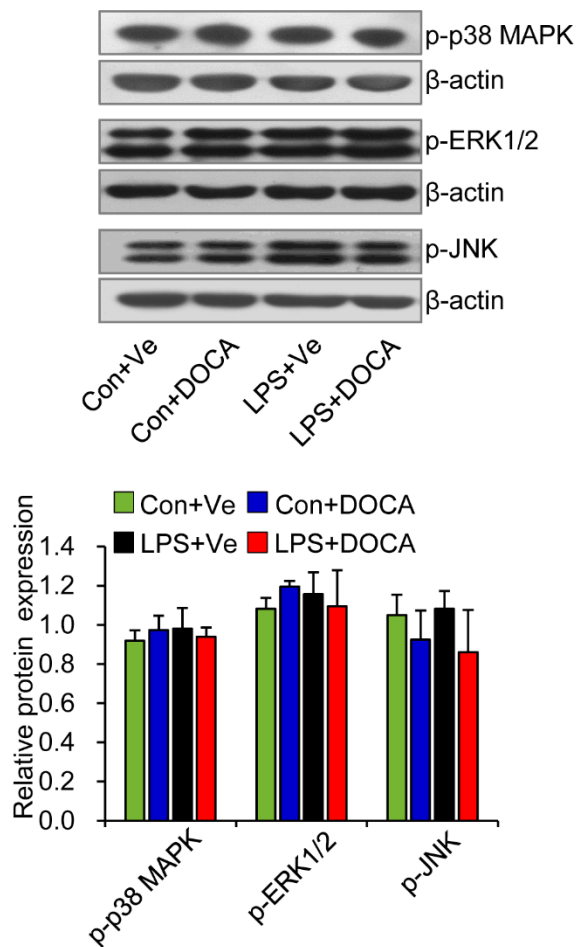

**Supplemental Fig. S4. The MAPK signaling was not changed after 4 weeks of DOCA-salt treatment in adult offspring of LPS-treated mothers.** Offspring were treated as described in Fig. 1a and the phosphorylation levels of anti-p-p38 MAPK, p-ERK1/2 and p-JNK in thoracic aortas were assessed by immunoblotting after 4 weeks of DOCA-salt treatment. Representative plots in each group and statistical data of relative densitometry, normalized by  $\beta$ -actin, were shown. n=6 per group.

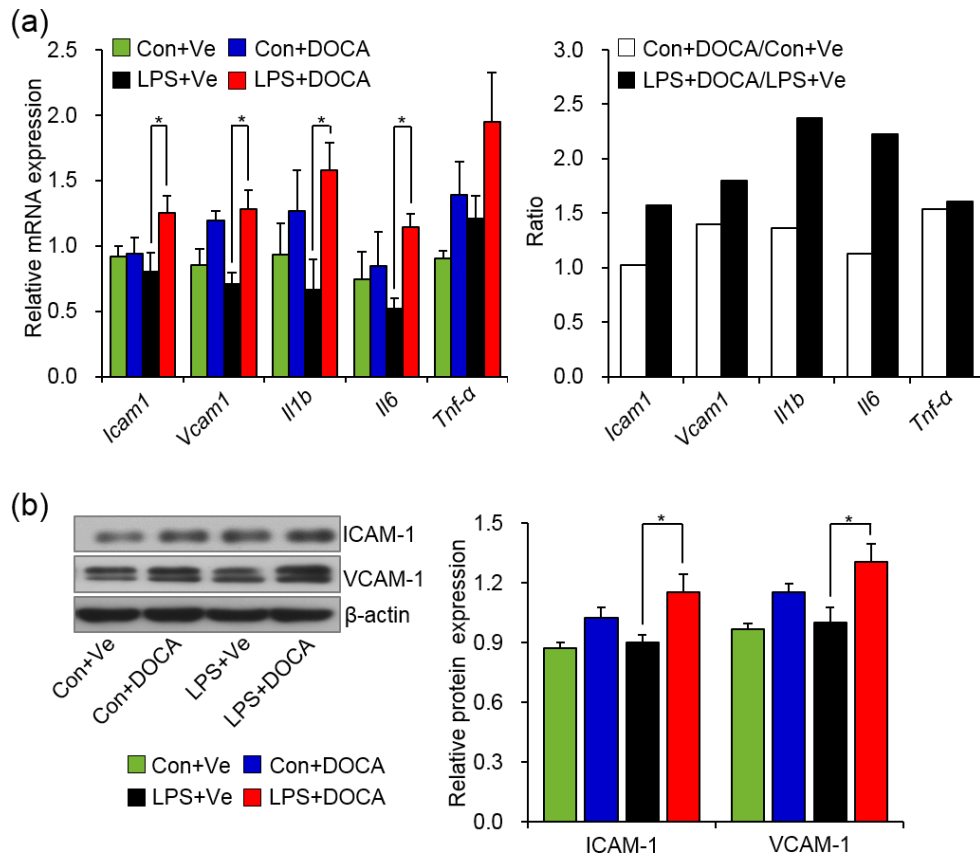

**Supplemental Fig. S5.** Prenatal exposure to LPS results in increased inflammatory factors in thoracic aortas of offspring after 4 weeks of DOCA-salt treatment. **(a)** Offspring were treated as described in Fig.1a and the mRNA levels of *Icam1*, *Vcam1*, *Il1b*, *Il6* and *Tnf-α* in thoracic aortas were determined by real-time RT-PCR.  $\beta$ -actin was taken as internal control. n = 6 - 7 per group. **(b)** Offspring were treated as described in Fig.1a and the protein expression levels of ICAM-1 and VCAM-1 in thoracic aortas were determined by immunoblotting in control and adult offspring of LPS-treated mothers after 4 weeks of DOCA-salt treatment. Representative plots in each group (left panel) and statistical data of relative densitometry, normalized by  $\beta$ -actin (right panel), were shown. n = 6 per group. Error bar represents S.E.M. \* $P < 0.05$  denotes the statistical comparison between the two marked treatment groups, respectively. Two-way ANOVA.

**Table S1.** Primers for real time RT-PCR

| Gene symbol                                    | Forward primer (5'-3')  | Reverse primer (5'-3')     |
|------------------------------------------------|-------------------------|----------------------------|
| <i>Sod1</i> <sup>1</sup>                       | TGTGTCCATTGAAGATCGTGTGA | TCTTGTTTCTCGTGGACCACC      |
| <i>Sod2</i> <sup>1</sup>                       | TTAACGCGCAGATCATGCA     | CCTCGGTGACGTTTCAGATTGT     |
| <i>Sod3</i>                                    | TTCCAGACACCTCAATCGC     | TCTGTGGAGTGCATAGGTGTG      |
| <i>Hmox1</i> <sup>2</sup>                      | TCTATCGTGCTCGCATGAAC    | CAGCTCCTCAAACAGCTCAA       |
| <i>Ucp2</i>                                    | GAGAGTCAAGG GCTAGCGC    | GCTTCGACAGTGCTCTGGTA       |
| <i>p22-phox</i> <sup>3</sup>                   | TGGCCTGATCCTCATCACAG    | AGGCACGGACAGCAGTAAGT       |
| <i>p47phox</i> <sup>3</sup>                    | TCACCGAGATCTACGAGTTC    | TCCCATGAGGCTGTTGAAGT       |
| <i>p67phox</i><br>( <i>Ncf2</i> ) <sup>1</sup> | GCTTCGGAACATGGTGTCTAAGA | AGGGTCAGGCAGTAGTTTTTCACTTG |
| <i>Nox1</i> <sup>4</sup>                       | CTTCCTCACTGGCTGGGATA    | CGACAGCATTGCGCAGGCT        |
| <i>Nox2</i>                                    | GGAGTGGTGTGTGAATGC      | TTTGGTGGAGGATGTGATGA       |
| <i>Nox4</i> <sup>5</sup>                       | ACAGTCCTGGCTTACCTTCG    | TTCTGGGATCCTCATTCTGG       |
| <i>Catalase</i><br>( <i>Cat</i> )              | AAACCCGATGTCCTGACCAC    | CCTTTGCCTTGGAGTATCTGG      |
| <i>Gpx1</i>                                    | TCGAACCCGATATAGAAGCCC   | CACCAAGCCCAGATACCAGG       |
| <i>Prdx3</i>                                   | GAAGGTTGCTCTGGTCCTCG    | CAGCAGGGGTGTGGAATGAA       |
| <i>Prdx5</i>                                   | AGCTGAGGTTTTGCGTCCTA    | GGTGTCTCCACCTTGATCG        |
| <i>Icam1</i>                                   | CTTTGCCCTGGTCCTCCAAT    | GTCTTCCCCAATGTCGCTCA       |

|                                                    |                        |                         |
|----------------------------------------------------|------------------------|-------------------------|
| <i>Vcam1</i>                                       | ACAAGGCTACATGAGGGTGC   | AACGGAATCCCCAACCTGTG    |
| <i>Tnf-<math>\alpha</math></i> ( <i>Tnf</i> )      | CAAGGCTGCCCCGACTATGTGC | TTGATGGCGGAGAGGAGGCTGAC |
| <i>Il1b</i>                                        | AAGCTGTCTTCAGGCCAACA   | CCCGTAGGGCGATTACAGTC    |
| <i>Il6</i>                                         | CTTCCAGCCAGTTGCCTTCTTG | GTCTGTTGTGGGTGGTATCCTC  |
| <i><math>\beta</math>-actin</i><br>( <i>Actb</i> ) | GACGTTGACATCCGTAAAGACC | TAGGA GCCAGGGCAGTAATCT  |

## References

1. Chabrashvili, T. *et al.* Effects of ANG II type 1 and 2 receptors on oxidative stress, renal NADPH oxidase, and SOD expression. *Am J Physiol Regul Integr Comp Physiol* **285**, R117-24 (2003).
2. Yoshida, T. *et al.* Monitoring changes in gene expression in renal ischemia-reperfusion in the rat. *Kidney Int* **61**, 1646-54 (2002).
3. Fan, C. *et al.* Synergy of aldosterone and high salt induces vascular smooth muscle hypertrophy through up-regulation of NOX1. *J Steroid Biochem Mol Biol* **111**, 29-36 (2008).
4. Uchizono, Y. *et al.* Expression of isoforms of NADPH oxidase components in rat pancreatic islets. *Life Sci* **80**, 133-9 (2006).
5. Zarzuelo, M.J. *et al.* SIRT1 inhibits NADPH oxidase activation and protects endothelial function in the rat aorta: implications for vascular aging. *Biochem Pharmacol* **85**, 1288-96 (2013).
